# Supplementary material for: Cessation of Nucleos(t)ide Analogue Therapy in Non-Cirrhotic Hepatitis B Patients with Prior Severe Acute Exacerbation
Source: MDPI journal article supplement (doi:10.3390/jcm10214883), 2021-10-23
Supplement: s1 [file s1]

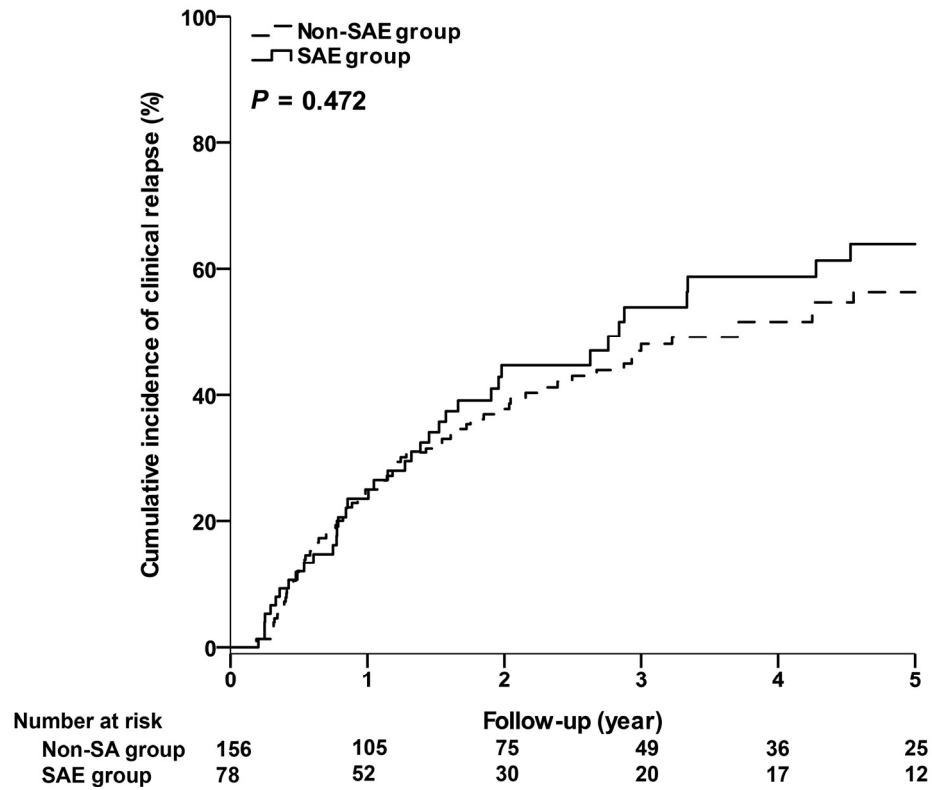

Figure S1. The cumulative incidences of clinical relapse.

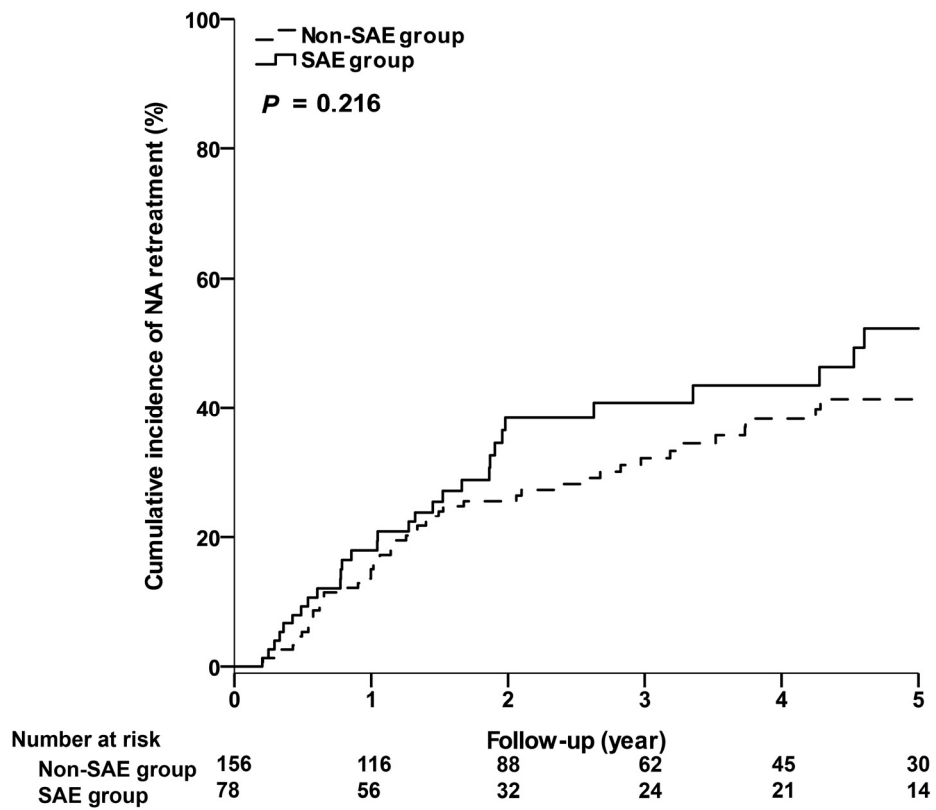

Figure S2. The cumulative incidences of NA retreatment.
